# Supplementary material
Source: publisher figshare collection journal article supplement (https://gsajournals.figshare.com/articles/dataset/_/13252664)
Supplement: Supplementary file 1 [file 2]

## Sheet: Table S1
Table S1 Tapestry table of raw contigs with classifications
Summary statistics generated by Tapestry (File S3) and ordered as per File S4.
Group shows sequences from the same chromosome or accessory genome, or common repeat type (eg Subtelomere).
Contig	Raw Length	GC %	Median Read Depth	Group	Notes
tig00003593	1491928	51	88	1	Chromosome
tig00003595	1243548	50.64	133	2	Chromosome, supernumerary
tig00000023	445576	49.83	75	2	Haplotype, tig3595
tig00000026	342611	53.96	63	2	Haplotype, tig3595
tig00000024	212351	46.57	32	2	Haplotype, tig3595
tig00306615	1178086	50.76	88	3	Incomplete
tig00000050	231117	51.9	32	3	Incomplete
tig00000037	1166746	52.03	81	4	Chromosome
tig00000038	189704	54.46	23	4	Haplotype tig37
tig00000043	176899	50.84	38	4	Haplotype tig37
tig00000018	1076494	51.74	83	5	Inversion
tig00003597	222300	51.74	41	5	Inversion
tig00000065	104319	53.68	35	5	Haplotype tig18/tig3597
tig00000033	60239	47.81	34	5	Subtelomere tig3597
tig00003614	15476	47.65	0	5	Repeat tig33/tig3597
tig00003601	1014199	49.99	80	6	Chromosome
tig00000049	134114	49.88	40	6	Haplotype tig3601
tig00003602	58238	50.02	4	6	Subtelomere tig3601
tig00003599	988284	49.8	83	7	Incomplete
tig00003600	73365	47.82	0	7	Haplotype tig3599
tig00000047	71900	49.33	3	7	Subtelomere tig3599
tig00000070	852128	49.89	89	8	Chromosome
tig00000060	773343	49.71	86	9	Chromosome
tig00000061	93668	48.89	28	9	Subtelomere tig60
tig00003605	767908	49.77	82	10	Chromosome
tig00000377	125489	44	31	10	Haplotype tig 3605
tig00000058	767463	50.9	86	11	Incomplete
tig00000055	758682	49.36	83	12	Chromosome
tig00000104	692209	51.35	82	13	Chromosome, translocation tig126
tig00000126	521443	50.57	87	14	Incomplete, translocation tig104
tig00000177	219070	46.78	45	14	Incomplete, translocation tig104
tig00000417	118437	50.28	44	14	Haplotype tig104/tig177
tig00000063	646966	49.19	88	15	Chromosome
tig00000069	103614	49.86	17	15	Haplotype tig63
tig00003607	622755	48.3	67	16	Chromosome
tig00000099	197835	51.08	7	16	Haplotype tig3607
tig00000082	602195	50.56	87	17	Chromosome
tig00000084	587628	50.41	86	18	Chromosome
tig00000093	133264	49.21	41	18	Haplotype tig84
tig00000095	569734	50.07	41	19	Incomplete
tig00000181	234596	47.67	38	19	Haplotype tig95
tig00000105	124507	53.33	33	19	Subtelomere tig95
tig00306621	544153	50.01	86	20	Chromosome
tig00000134	525903	49.54	62	21	Incomplete
tig00000184	226671	49.33	30	21	Haplotype tig134
tig00000197	520223	51.31	40	22	Chromosome
tig00306623	145515	49.3	12	22	Subtelomere tig197
tig00000208	124316	52.93	20	22	Subtelomere tig197
tig00306624	96365	48.96	0	22	Subtelomere tig197
tig00000238	507555	49.15	69	23	Chromosome
tig00000255	165712	52.72	32	23	Haplotype tig238
tig00000218	438214	47.42	90	24	Chromosome
tig00003608	422011	47.37	83	25	Incomplete
tig00306617	413432	46.25	78	26	Chromosome
tig00000170	121725	47.56	24	26	Subtelomere 306617
tig00000209	380498	47.67	82	27	Chromosome
tig00000158	363446	47.62	91	28	Chromosome
tig00000182	296108	47.49	91	29	Chromosome
tig00000001	57346	31.86	83	30	Maxicircle
tig00000002	30918	31.9	0	30	Maxicircle
tig00000005	30370	31.94	0	30	Maxicircle
tig00000015	915769	31.12	71	31	Symbiont
tig00000198	45325	43.5	0	32	Minicircle
tig00000199	35449	43.24	0	32	Minicircle
tig00000071	33223	43.3	0	32	Minicircle
tig00000067	19340	43.35	1	32	Minicircle
tig00000298	19158	43.51	0	32	Minicircle
tig00000072	18787	43.73	1	32	Minicircle
tig00000336	18518	43.61	2	32	Minicircle
tig00000582	15638	43.23	0	32	Minicircle
tig00000227	14983	43.3	0	32	Minicircle
tig00000272	14673	43.77	0	32	Minicircle
tig00000207	14457	43.78	0	32	Minicircle
tig00000262	14091	43.67	0	32	Minicircle
tig00000419	13662	43.75	3	32	Minicircle
tig00000234	13524	43.03	0	32	Minicircle
tig00000390	13312	43.32	0	32	Minicircle
tig00000450	13168	43.32	0	32	Minicircle
tig00000081	13160	42.97	0	32	Minicircle
tig00000469	12930	43.2	15	32	Minicircle
tig00000282	12723	43.56	1	32	Minicircle
tig00000735	12456	43.54	1	32	Minicircle
tig00000079	12411	43.24	0	32	Minicircle
tig00000638	12264	43.24	0	32	Minicircle
tig00003613	12088	43.42	0	32	Minicircle
tig00306633	11919	42.97	0	32	Minicircle
tig00000216	11915	43.77	0	32	Minicircle
tig00000111	11799	42.86	0	32	Minicircle
tig00306637	11794	43.23	0	32	Minicircle
tig00000106	11787	43.45	0	32	Minicircle
tig00000565	11767	43.15	0	32	Minicircle
tig00000389	11682	43.83	14	32	Minicircle
tig00000357	11571	43.59	1	32	Minicircle
tig00000427	11357	42.63	0	32	Minicircle
tig00000103	11349	42.65	0	32	Minicircle
tig00306619	11213	43.9	1	32	Minicircle
tig00000276	11193	42.93	0	32	Minicircle
tig00000555	11131	42.6	0	32	Minicircle
tig00000526	10938	43.69	0	32	Minicircle
tig00000369	10834	43.67	0	32	Minicircle
tig00000373	10780	43.62	0	32	Minicircle
tig00000290	10466	43.68	0	32	Minicircle
tig00000073	10454	43.28	0	32	Minicircle
tig00000477	10326	44.1	1	32	Minicircle
tig00000648	10189	42.77	0	32	Minicircle
tig00000257	10096	43.49	1	32	Minicircle
tig00000329	9822	43.17	0	32	Minicircle
tig00000493	9685	43.18	1	32	Minicircle
tig00000173	9629	43.06	0	32	Minicircle
tig00000788	9611	43.39	5	32	Minicircle
tig00000133	9599	42.68	1	32	Minicircle
tig00000806	9519	42.79	1	32	Minicircle
tig00000645	9286	43.22	0	32	Minicircle
tig00000436	9227	42.79	0	32	Minicircle
tig00000210	9136	43.38	0	32	Minicircle
tig00000470	9092	43.24	0	32	Minicircle
tig00000228	9066	43.75	0	32	Minicircle
tig00000453	8965	44.06	0	32	Minicircle
tig00000661	8924	43.13	0	32	Minicircle
tig00000558	8792	43.44	0	32	Minicircle
tig00000326	8777	43.1	0	32	Minicircle
tig00000747	8759	43.12	2	32	Minicircle
tig00306636	8664	43.54	4	32	Minicircle
tig00306643	8460	43.29	0	32	Minicircle
tig00000643	8419	44.09	1	32	Minicircle
tig00306654	8303	42.56	0	32	Minicircle
tig00000835	8251	44.04	0	32	Minicircle
tig00000736	8206	43.77	1	32	Minicircle
tig00000157	8153	42.21	8	32	Minicircle
tig00000816	8022	43.23	1	32	Minicircle
tig00000473	8022	43.24	0	32	Minicircle
tig00000393	7995	41.76	0	32	Minicircle
tig00000449	7917	42.98	1	32	Minicircle
tig00000778	7871	43.59	1	32	Minicircle
tig00000346	7689	44.77	1	32	Minicircle
tig00000791	7664	43.15	0	32	Minicircle
tig00000597	7634	43.4	0	32	Minicircle
tig00306656	7328	45.25	0	32	Minicircle
tig00000557	7222	43.04	4	32	Minicircle
tig00000609	7082	42.6	0	32	Minicircle
tig00000629	7009	41.43	0	32	Minicircle
tig00000824	6904	42.22	1	32	Minicircle
tig00000650	6904	43.54	0	32	Minicircle
tig00000275	6889	42.78	0	32	Minicircle
tig00000786	6798	44.31	0	32	Minicircle
tig00003610	6733	43.9	0	32	Minicircle
tig00306650	6672	42.54	0	32	Minicircle
tig00000781	6639	42.64	0	32	Minicircle
tig00000708	6604	43.5	0	32	Minicircle
tig00000414	6396	43.21	0	32	Minicircle
tig00000587	6239	44.59	1	32	Minicircle
tig00306632	6202	44.07	0	32	Minicircle
tig00000865	6084	44.66	0	32	Minicircle
tig00306658	5933	43.54	0	32	Minicircle
tig00000812	5845	43.8	0	32	Minicircle
tig00000776	5796	43.13	0	32	Minicircle
tig00306635	5720	43.76	0	32	Minicircle
tig00000808	5639	41.76	0	32	Minicircle
tig00000224	5490	45.37	0	32	Minicircle
tig00306653	5460	42.97	0	32	Minicircle
tig00000724	5385	42.84	0	32	Minicircle
tig00306655	5160	44.21	0	32	Minicircle
tig00306630	5131	45.7	0	32	Minicircle
tig00306640	5095	42.55	0	32	Minicircle
tig00000504	5042	42.03	0	32	Minicircle
tig00000857	4638	42.58	0	32	Minicircle
tig00306646	4547	43.13	0	32	Minicircle
tig00000800	4529	42.42	0	32	Minicircle
tig00000337	4466	41.58	0	32	Minicircle
tig00306659	4395	43.16	0	32	Minicircle
tig00000796	4325	44	0	32	Minicircle
tig00306634	4318	43.26	0	32	Minicircle
tig00306645	4301	44.8	0	32	Minicircle
tig00003197	4165	42.81	0	32	Minicircle
tig00306649	4133	43.53	0	32	Minicircle
tig00306642	4103	45.58	0	32	Minicircle
tig00306652	3695	40.81	1	32	Minicircle
tig00003617	3694	41.64	0	32	Minicircle
tig00306641	3455	45.15	0	32	Minicircle
tig00306620	3161	46.41	0	32	Minicircle
tig00306638	2956	44.18	0	32	Minicircle
tig00003611	2912	43.61	0	32	Minicircle
tig00306629	2682	45.75	0	32	Minicircle
tig00306644	2643	46.42	1	32	Minicircle
tig00002231	2633	41.21	0	32	Minicircle
tig00306657	2476	41.68	0	32	Minicircle
tig00003612	1833	40.86	0	32	Minicircle
tig00306639	1250	45.04	0	32	Minicircle
tig00306660	1094	39.03	0	32	Minicircle
tig00003594	27350	46.5	0	33	Subtelomere
tig00003615	26655	49.44	0	33	Subtelomere
tig00003596	25674	44.68	0	33	Subtelomere
tig00003606	24323	51.41	7	33	Subtelomere
tig00306625	21975	47.41	4	33	Subtelomere
tig00000053	21493	46.75	14	33	Subtelomere
tig00000698	21381	48.07	18	33	Subtelomere
tig00000017	21274	47.14	9	33	Subtelomere
tig00306628	21177	48.6	2	33	Subtelomere
tig00000034	21170	47.49	38	33	Subtelomere
tig00306627	21126	49.34	8	33	Subtelomere
tig00003604	21020	49.55	9	33	Subtelomere
tig00000810	20537	47.87	20	33	Subtelomere
tig00306622	20226	46.59	0	33	Subtelomere
tig00306626	19796	47.11	1	33	Subtelomere
tig00306647	19624	46.75	19	33	Subtelomere
tig00306616	15084	47.41	3	33	Subtelomere
tig00306648	13239	45.51	0	33	Subtelomere
tig00003616	12747	46.37	1	33	Subtelomere
tig00306618	9245	46.87	0	33	Subtelomere
tig00000783	2803	51.44	4	33	Subtelomere
tig00003603	1760	76.08	5	33	Subtelomere
tig00000846	3173	46.55	0	34	Repeat

## Sheet: Table S2
Table S2 Summary of genome edits and additional translocation and inversion haplotypes
See Supplemental Methods (File S1 Section 1) for details of features listed here.
Construction refers to parts of the raw genome (File S2) that were concatenated together in the orders listed here to produce the sequences in the Final contig column.
(rev), reverse complemented sequence.
Feature	Haplotype	Construction	Raw Length (bp)	Final contig
Symbiont		tig00000015:1-819068	819068	symbiont
Maxicircle		tig00000002:1-29665	29665	maxicircle
Translocation	1	tig000000104:1-692209	692209	chr13
	2	tig00000177:1-219070 (rev), tig00000126:183682-521443	556832	chr18
	3	tig00000104:1-195233, tig00000126:109207-521443	607438	None
	4	tig00000177:137532-219070 (rev), tig00000417:5-118415, tig00000104:258648-692209	633512	None
Inversion	1	tig00003597:1-222300 (rev), tig00000018:7-340531 (rev), tig00000018:472858-1076494	1166642	None
	2	tig00003597:65364-222300 (rev), tig00000065:50967-50973 (rev), tig00000018:66579-1076494	1166680	chr05
Palindrome		tig00000095:54226-569734	515509	chr22
Incomplete 1		tig00000050:3-231117 (rev), tig00306615:243148-1178086	1166054	chr04
Incomplete 2		tig00003599:1-920524, tig00000047:4-71900	992421	chr07
Telomere 1		tig00000058:1220-766765	765546	chr11
Telomere 2		tig00003608:1-420743	420743	chr25

## Sheet: Table S3
Table S3 Primer sequences
Locations refer to the polished genome (File S5).
Next Best Hit reports the second-best match to the primer sequence in the genome assembly, with hit positions in the primer sequence compared to primer length, and number of matches given within the length of the hit.
All next best hits are worse than the perfect match to the original region of interest, and no pair of primers have two next best hits near each other such that a second product could be formed.
Primer	Sequence	Next Best Hit
		Location	Hit Positions/Primer Length	Matches/Hit Length
Incomplete 1 Left	GTACGCTTGTGCTGCATGAG	chr08:730114	4-19/20	15/16
Incomplete 1 Right	AGTTGGATGCGGCCATCTAC	chr01:170830	1-16/20	15/16
Incomplete 2 Left	GCATCTTCACGCTGTTGACC	chr07:927598	5-20/20	15/16
Incomplete 2 Right	TCGACAGTGTACGTGTGTGAG	chr14:349315	6-21/21	15/16
Inversion I1	ACCGATCGCTCTTCTGAACC	chr12:135898	5-19/20	15/15
Inversion I2	GTGCTTCCATCCACCGTTTG	chr03:615714	4-20/20	16/17
Inversion I3	TTCCGCTGATTGTCGAGGTG	chr09:213541	4-19/20	15/16
Inversion I4	GGTGGAGGGACAGGTAGGAG	chr08:382808	5-20/20	15/16
Translocation T1	GGACGTCCTTCAGCATCTCC	chr22:68587	3-18/20	15/16
Translocation T2	GTCAAAGGTGCAGCAGAACG	chr05:1087082	3-20/20	17/18
Translocation T3	GACAGACGCCACCTGTAACC	chr03:520639	3-18/20	15/16
Translocation T4	CACACACGATCAAAGTGCGG	chr01:721750	1-16/20	15/16

## Sheet: Table S4
Table S4 Expected primer products
Locations refer to the polished genome (File S5).
Primers were designed to span the Join Location and should produce products with the sequence in the Product range, with the given Product length.
Left Primer	Right Primer	Join Location	Product range	Expected product length (bp)
Incomplete 1 Left	Incomplete 1 Right	chr04:232356	chr04:232189-232483	295
Incomplete 2 Left	Incomplete 2 Right	chr07:927040	chr07:927011-927216	206
Inversion I1	Inversion I2	chr05:157653-157669	chr05:157519-157743	225
Inversion I1	Inversion I3	chr05b:157653	chr05b:157519-157676	158
Inversion I3	Inversion I4	chr05:498193-498199	chr05:498167-498277	111
Inversion I2	Inversion I4	chr05b:498192	chr05b:498100-498277	178
Translocation T1	Translocation T2	chr18:141112	chr18:141042-141279	238
Translocation T3	Translocation T4	chr13:196522	chr13:196458-196643	186
Translocation T1	Translocation T4	chr18+chr13	chr18_13:141042-141233	192
Translocation T3	Translocation T2	chr13+chr18	chr13_18:196458-196689	232

## Sheet: Table S5
Table S5 Genome summary
Raw names are tig00… if kept intact from the raw assembly (File S2); otherwise, they have been edited as per Table S2.
Lengths are given for the raw assembly (File S2), the polished assembly (File S5) and the assembly after annotation transfer (File S9),
where some gene sequences were replaced with sequences from the GCA_000442575 assembly.
Raw name	Raw length	Final name	Polished length	Annotated length
tig00003593	1491928	chr01	1502714	1502655
tig00003595	1243548	chr02	1255100	1255297
tig00000037	1166746	chr03	1174921	1174937
Incomplete 1	1166054	chr04	1174919	1175096
Inversion Haplotype 2	1166680	chr05	1174890	1174864
tig00003601	1014199	chr06	1022976	1022903
Incomplete 2	992421	chr07	999268	999236
tig00000070	852128	chr08	859818	859978
tig00000060	773343	chr09	780442	780481
tig00003605	767908	chr10	774965	774942
Telomere 1	765546	chr11	770936	771299
tig00000055	758682	chr12	764879	764708
Translocation Haplotype 1	692209	chr13	698360	698408
tig00000063	646966	chr14	652873	652782
tig00003607	622755	chr15	630295	630276
tig00000082	602195	chr16	610745	610643
tig00000084	587628	chr17	590071	590063
Translocation Haplotype 2	556832	chr18	561060	561137
tig00306621	544153	chr19	548156	548134
tig00000134	525903	chr20	530488	530564
tig00000197	520223	chr21	524844	524731
Palindrome	515509	chr22	519680	519842
tig00000238	507555	chr23	512855	512873
tig00000218	438214	chr24	444867	444934
Telomere 2	420743	chr25	424872	424834
tig00306617	413432	chr26	418110	418190
tig00000209	380498	chr27	385594	385744
tig00000158	363446	chr28	367090	367047
tig00000182	296108	chr29	299486	299483
TOTAL	20793552		20975274	20976081
