# Supplementary material
Source: publisher figshare collection journal article supplement (https://gsajournals.figshare.com/articles/dataset/_/13252664)

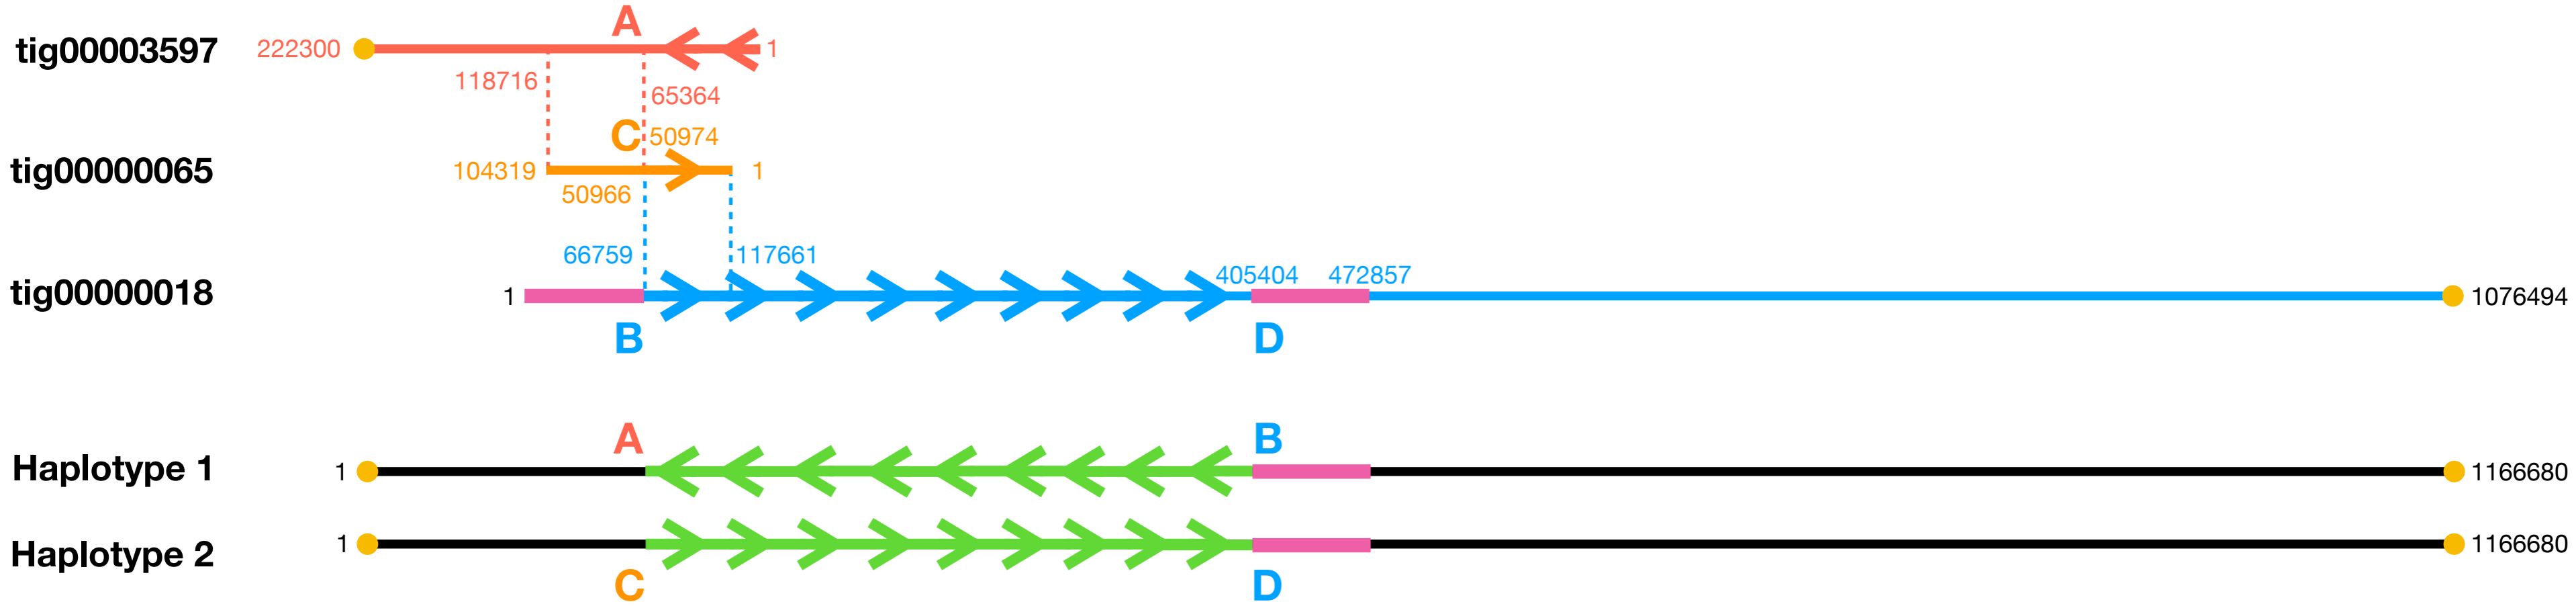

Supplement: Supplementary file 2 [file 2]

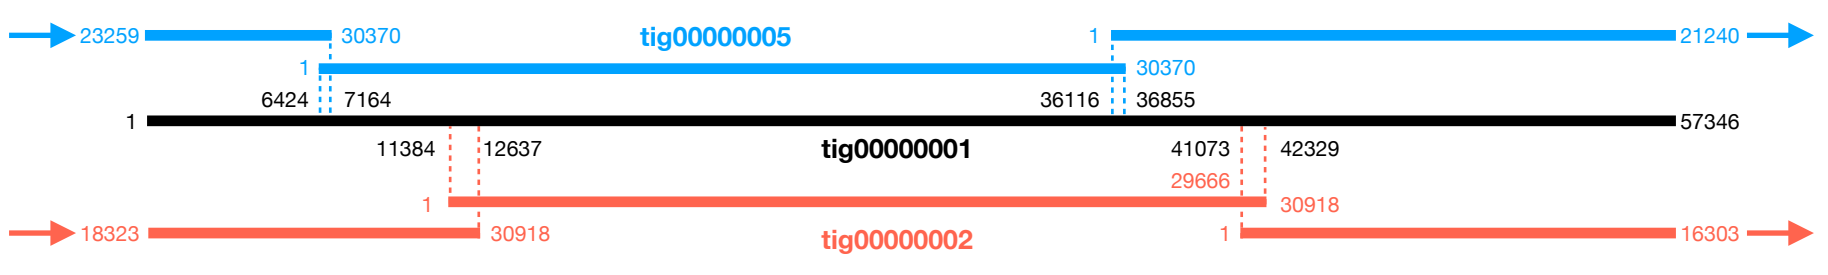

Supplement: Supplementary file 3 [file 2]

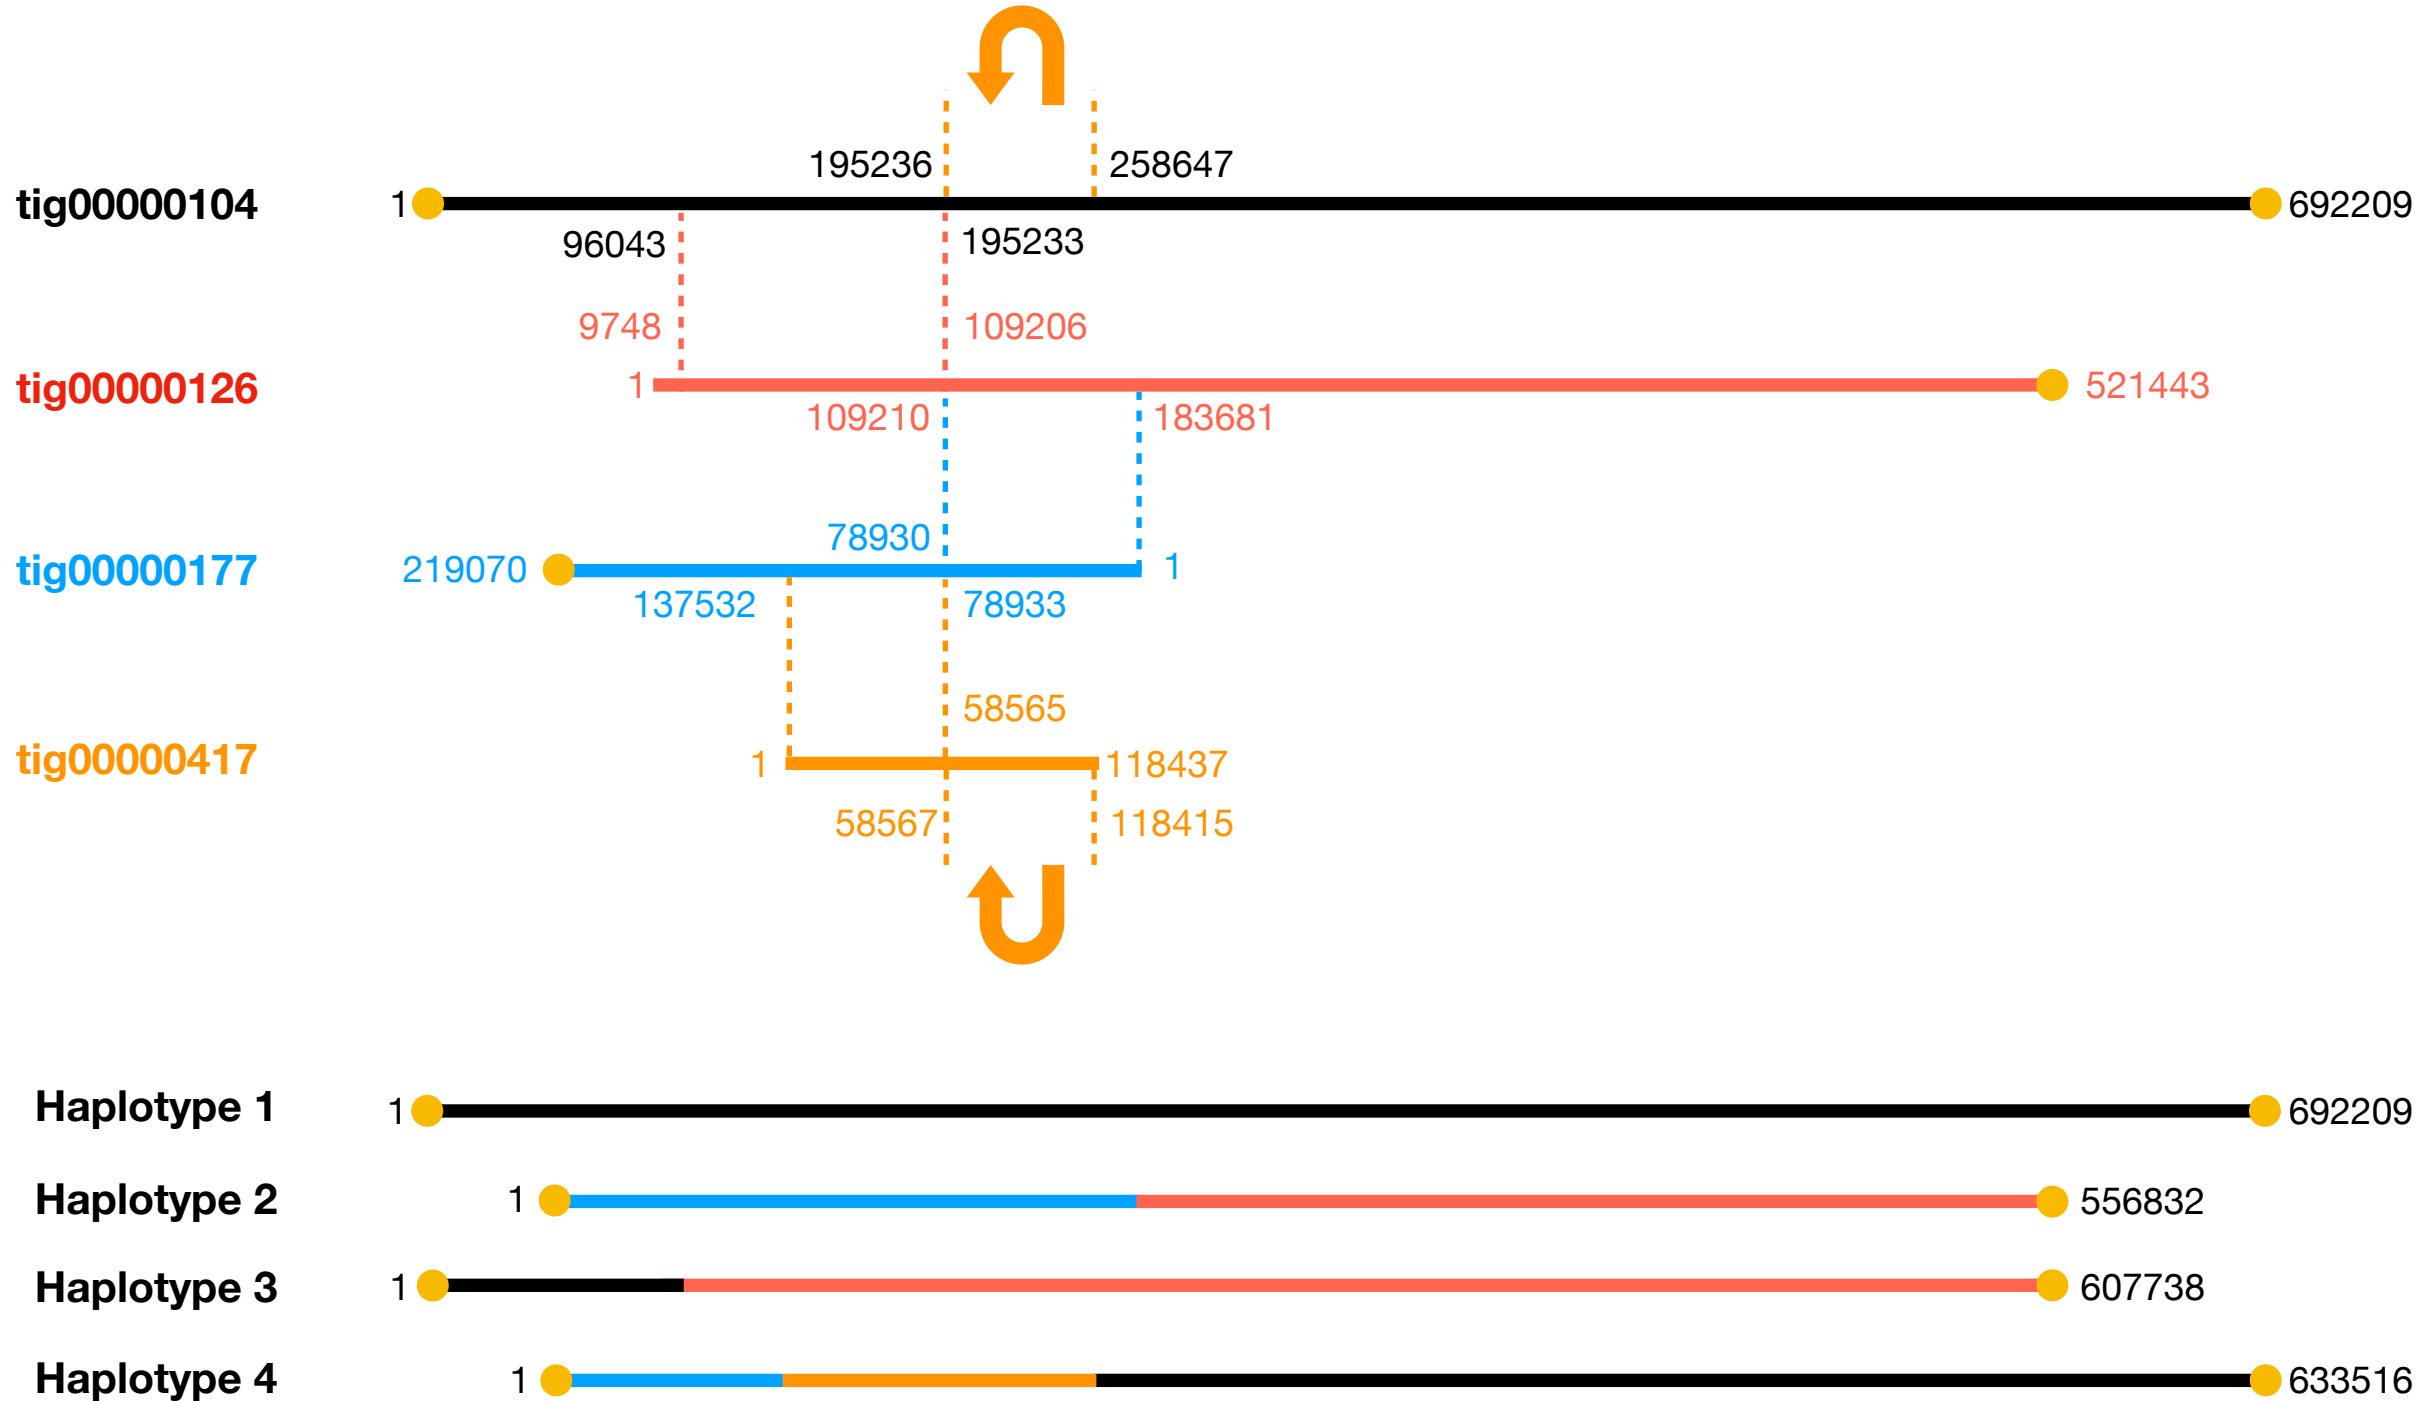

Supplement: Supplementary file 4 [file 2]

**tig00003593**

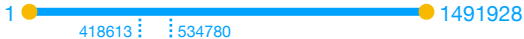

**tig00306615**

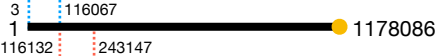

**tig00000050**

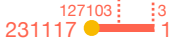

Supplement: Supplementary file 5 [file 2]

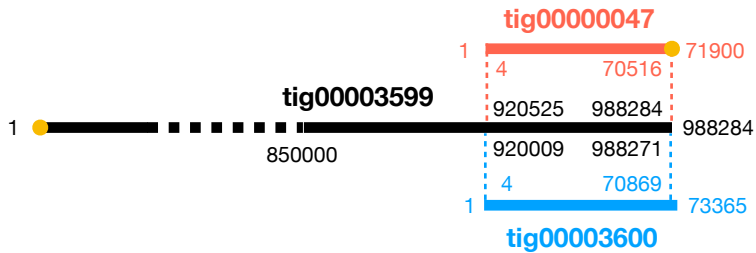

Supplement: Supplementary file 6 [file 2]
